# Supplementary material for: Modulation of Sirtuin 3 by N-Acetylcysteine Preserves Mitochondrial Oxidative Phosphorylation and Restores Bisphenol A-Induced Kidney Damage in High-Fat-Diet-Fed Rats
Source: MDPI journal article supplement (doi:10.3390/cimb46050296), 2024-05-18
Supplement: s1 [file s1]

## Supplementary materials

**Table S1.** Composition and energy content of the high-fat diet (Pratchayasakul et al., 2011).

| Composition                 | High-fat diet      |                |            |
|-----------------------------|--------------------|----------------|------------|
|                             | g                  | Kcal           | % Energy   |
| Carbohydrate                | 190.76             | 763.04         | 14.27      |
| Protein                     | 353.60             | 1414.40        | 26.45      |
| Fat (Lard)                  | 342.24             | 3080.16        | 57.60      |
| Cholesterol                 | 10.00              | 90.00          | 1.68       |
| Vitamin and mineral mixture | 85.19              |                |            |
| DL-Methionine               | 3.00               |                |            |
| Fiber                       | 13.21              |                |            |
| Yeast powder                | 1.00               |                |            |
| Sodium chloride             | 1.00               |                |            |
| <b>Total</b>                | <b>1000</b>        | <b>5347.60</b> | <b>100</b> |
| <b>Metabolizable energy</b> | <b>5.35 Kcal/g</b> |                |            |

Pratchayasakul, W.; Kerdphoo, S.; Petsophonsakul, P.; Pongchaidecha, A.; Chattipakorn, N.; Chattipakorn, S.C. Effects of high-fat diet on insulin receptor function in rat hippocampus and the level of neuronal corticosterone. *Life Sci* **2011**, *88*, 619-627.  
doi:10.1016/j.lfs.2011.02.003

**Table S2** Composition and energy content of the normal diet (CP082G, Perfect Companion Group Company Limited, Chiang Mai, Thailand).

| Composition                 | Normal diet (CP082) |                |            |
|-----------------------------|---------------------|----------------|------------|
|                             | g                   | Kcal           | % Energy   |
| Carbohydrate                | 495.30              | 1981.20        | 51.99      |
| Fat                         | 83.70               | 753.30         | 19.77      |
| Protein                     | 269.00              | 1076.00        | 28.24      |
| Vitamin and mineral mixture | 65.40               | -              | -          |
| Fiber                       | 34.30               | -              | -          |
| <b>Total</b>                | <b>947.70</b>       | <b>3810.50</b> | <b>100</b> |
| <b>Metabolizable energy</b> | <b>4.02 Kcal/g</b>  |                |            |

**Table S3.** The details of antibodies used in the study.

| Antibodies                                      | Dilution | Catalog Number | Provider       |
|-------------------------------------------------|----------|----------------|----------------|
| Total OXPHOS antibody cocktail<br>(Complex I-V) | 1:1000   | ab110413       | Abcam          |
| Total AMPK                                      | 1:1000   | 2532           | Cell Signaling |
| p-AMPK <sup>Thr172</sup>                        | 1:1000   | 07-681         | Merck          |
| PGC-1 $\alpha$                                  | 1:1000   | AB3242         | Merck          |
| SIRT3                                           | 1:1000   | 5490S          | Cell Signaling |
| Ac-SOD2                                         | 1:1000   | ab218529       | Abcam          |
| SOD2                                            | 1:1000   | 13194          | Cell Signaling |
| p-DRP1 <sup>Ser616</sup>                        | 1:1000   | 4494           | Cell Signaling |
| Mfn2                                            | 1:1000   | 9482           | Cell Signaling |
| Bax                                             | 1:1000   | ab289364       | Abcam          |
| Bcl-2                                           | 1:1000   | 4223           | Cell Signaling |
| Pro-caspase3<br>Cleave-caspase3                 | 1:1000   | 14220          | Cell Signaling |
| p-IKB $\alpha$                                  | 1:1000   | 2859           | Cell Signaling |
| p-NF $\kappa$ B p65                             | 1:1000   | 3033           | Cell Signaling |
| TNF-1 $\alpha$                                  | 1:1000   | 13377          | Cell Signaling |
| IL-1 $\beta$                                    | 1:1000   | AB1832P        | Merck          |
| $\beta$ -Actin                                  | 1:1000   | 8457           | Cell Signaling |
